# Supplementary material for: Regulation of retinal angiogenesis by endothelial nitric oxide synthase signaling pathway
Source: PubMed Central journal article supplement — Korean J Physiol Pharmacol. 2016 Aug 26;20(5):533–8. doi: 10.4196/kjpp.2016.20.5.533 (PMC5015000; doi:10.4196/kjpp.2016.20.5.533), 2016-08-26
Supplement: kjpp-20-533-s001.pdf [file kjpp-20-533-s001.pdf]

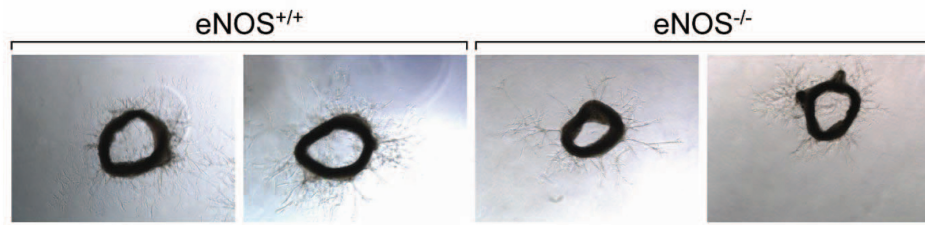

**Supplementary figure 1.** eNOS regulates angiogenic sprouting. Aortas were isolated from the wild type and eNOS knockout mice, and embedded in growth factor-reduced matrigel-coated plates in the presence of EGM-2. After 6 days, images were captured on a bright field microscope at  $\times 5$  magnification.
